# Supplementary material for: Highly porous coral-like silicon particles synthesized by an ultra-simple thermal-reduction method
Source: Royal Society of Chemistry journal article supplement (doi:10.1039/c7ta09042k), 2018-01-01
Supplement: c7ta09042k2.pdf [file c7ta09042k2.pdf]

## Supporting Information

*for*

# **Highly porous coral-like silicon particles synthesized by an ultra-simple thermal-reduction method**

*Duc Tung Ngo,<sup>a</sup> Hang T. T. Le,<sup>a,c</sup> Xuan-Manh Pham,<sup>a</sup> Ji-Won Jung,<sup>b</sup> Ngoc Hung Vu,<sup>a</sup>*

*John G. Fisher,<sup>a</sup> Won Bin Im,<sup>a</sup> Il-Doo Kim,<sup>b</sup> and Chan-Jin Park<sup>a,\*</sup>*

<sup>a</sup> Department of Materials Science and Engineering, Chonnam National University, 77, Yongbongro, Bukgu, Gwangju 61186, South Korea

<sup>b</sup> Department of Materials Science and Engineering, Korea Advanced Institute of Science and Technology (KAIST), 291, Daehakro, Yuseonggu, Daejeon 34141, South Korea

<sup>c</sup> School of Chemical Engineering, Hanoi University of Science and Technology, 1 Dai Co Viet Road, Hanoi 100000, Vietnam

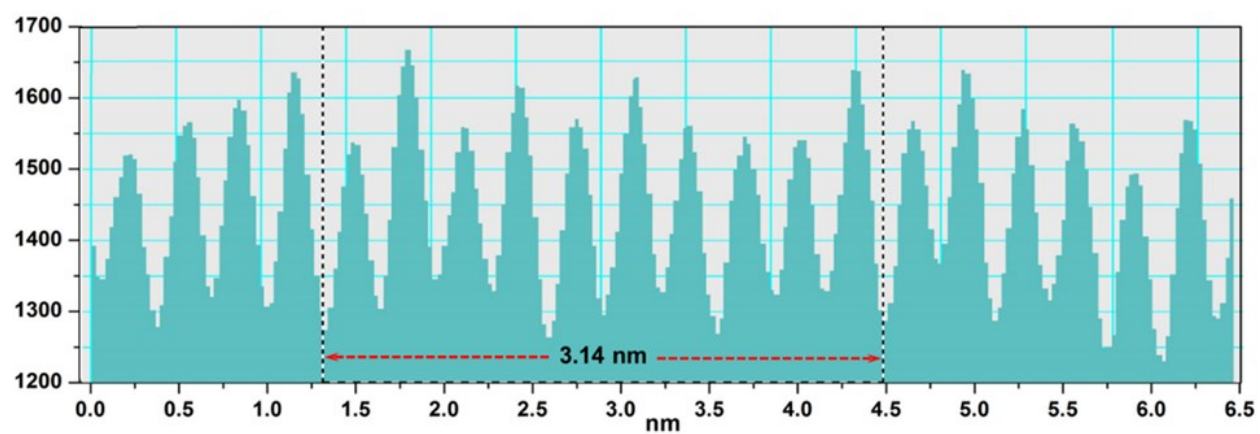

**Fig. S1-** d-spacing of the nanoporous Si, which corresponds to the position selected in **Fig. 2e**.

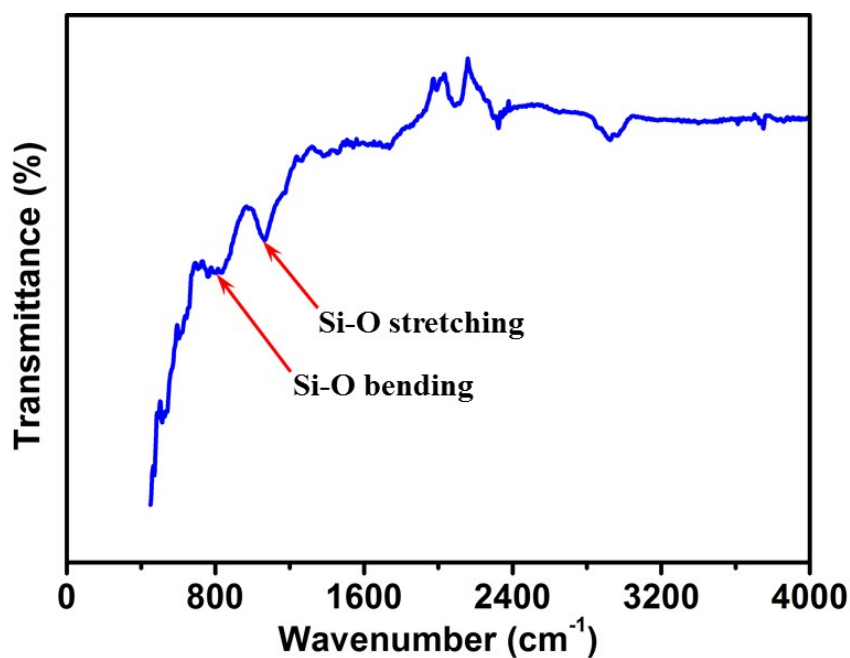

**Fig. S2.** FTIR spectrum of the nanoporous Si.

**Fig. S2** shows the FTIR transmission spectrum of the nanoporous Si, measured at 500–4000 cm<sup>-1</sup>. As shown in **Fig. S2**, two typical absorption peaks, corresponding to Si-O bonding, were observed at 814 and 1064 cm<sup>-1</sup>. The first peak corresponds to Si-O stretching vibration, and the second peak corresponds to Si-O bending vibration.<sup>[1]</sup> This demonstrates that the synthesized nanoporous Si sample contains a certain amount of silica.

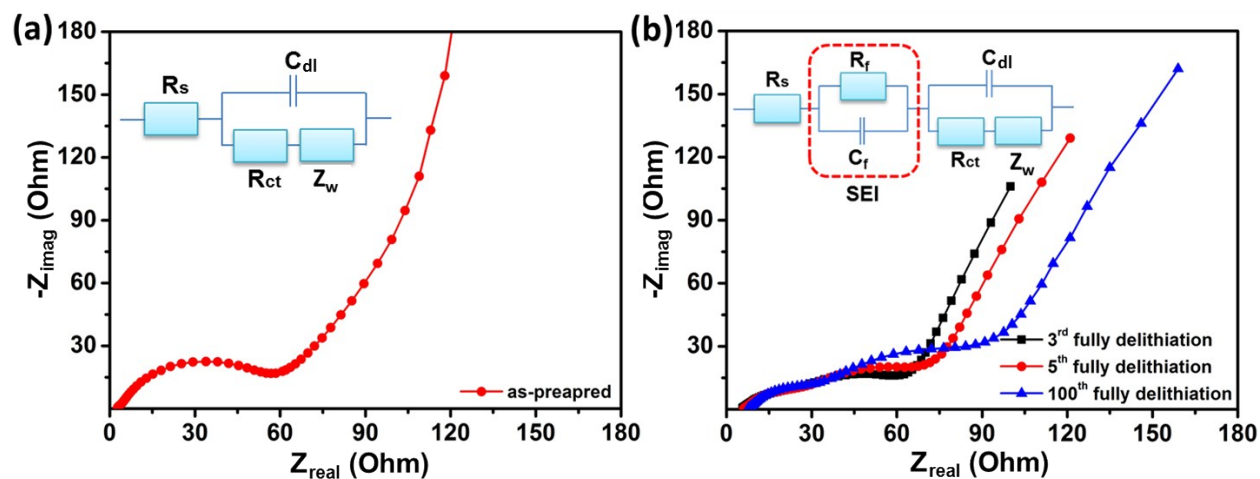

**Fig. S3.** Electrochemical impedance spectra of the nanoporous Si electrodes: (a) spectra of the as-prepared electrode; (b) spectra of the fully-charged (dealloyed) electrode following 3, 5, and 100 cycles. Insets of Fig. S3 (a) and (b) show the equivalent circuit prior to, and following cycling, respectively.

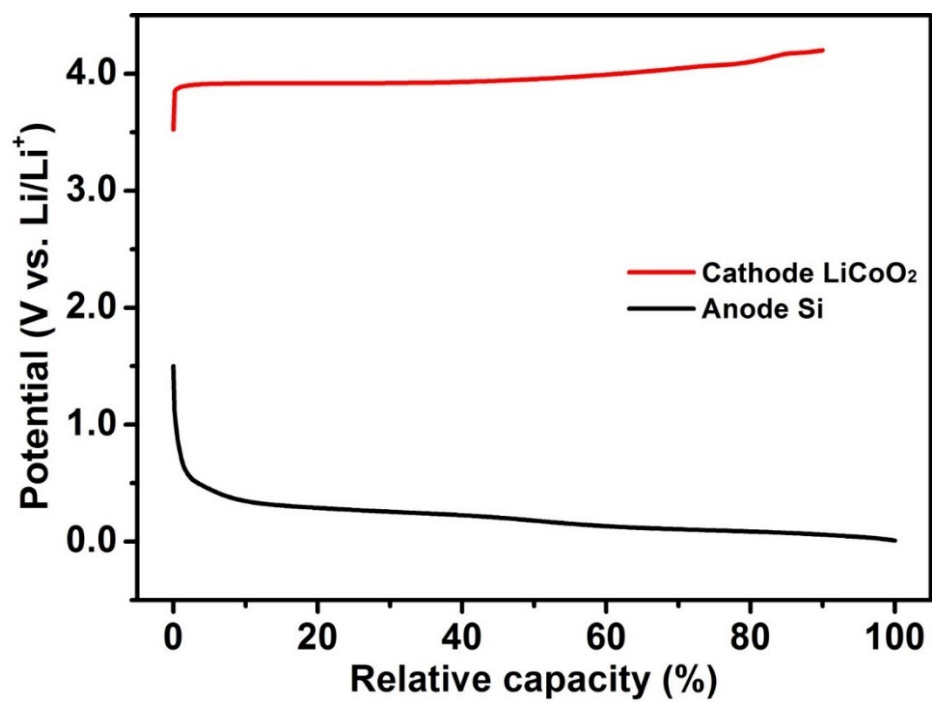

**Fig. S4.** Capacity of the cathode relative to that of the anode of the full cell of Si-LiCoO<sub>2</sub>.

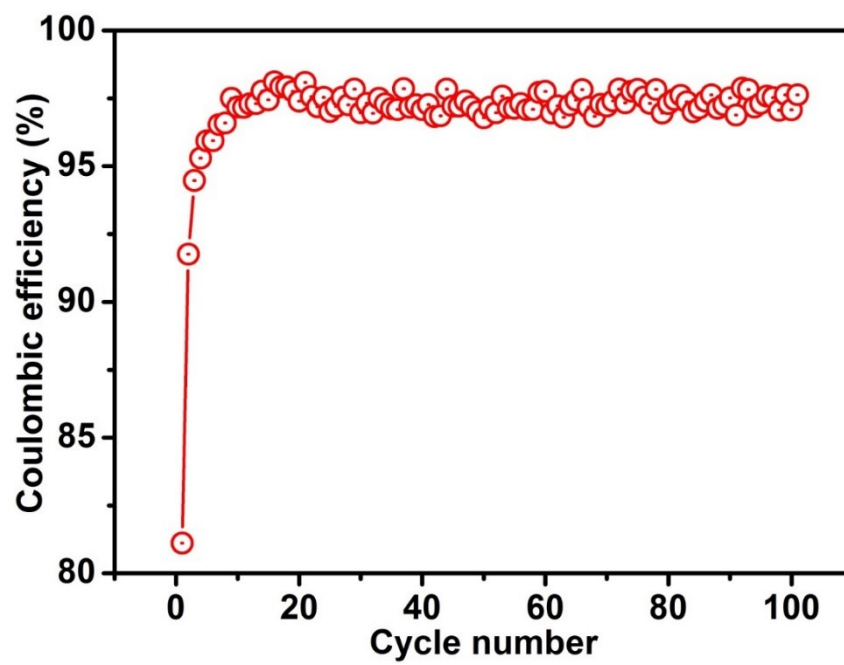

**Fig. S5.** Coulombic efficiency of the Si-LiCoO<sub>2</sub> full cell, corresponding to Fig. 7(a), tested under a rate of C/10.

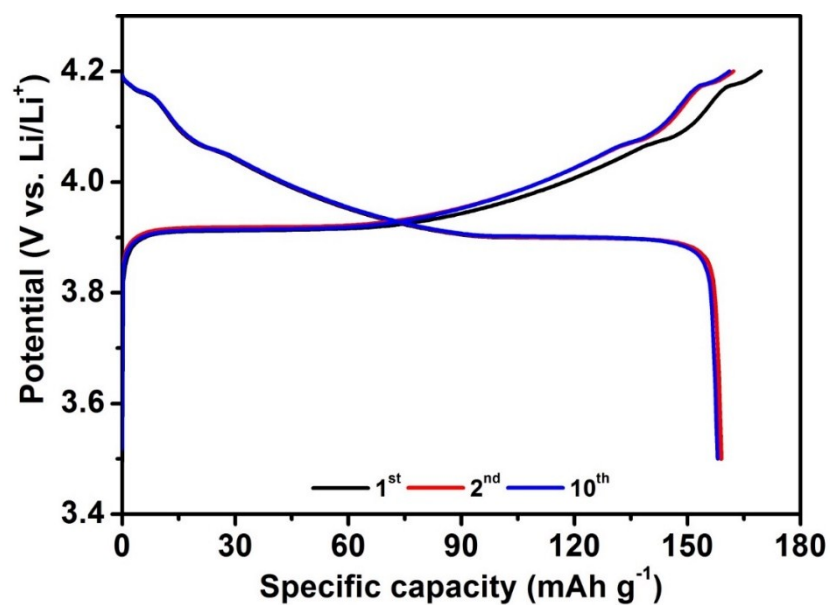

**Fig. S6.** Potential profile of the LiCoO<sub>2</sub> electrode, tested under a rate of C/10.

## References

- 1) S.-K. Lee, S.-M. Oh, E. Park, B. Scrosati, J. Hassoun, M.-S. Park, Y.-J. Kim, H. Kim, I. Belharouak, Y.-K. Sun, Nano Lett. 2015, 15, 2863.
